# Supplementary figures and images for: JNK interaction with Sab mediates ER stress induced inhibition of mitochondrial respiration and cell death
Source: PubMed Central journal article supplement — Cell Death Dis. 2014 Jan 9;5(1):e989–. doi: 10.1038/cddis.2013.522 (PMC4040675; doi:10.1038/cddis.2013.522), 2014-01-09

## SUPPLEMENTAL FIGURES

Fig.S1

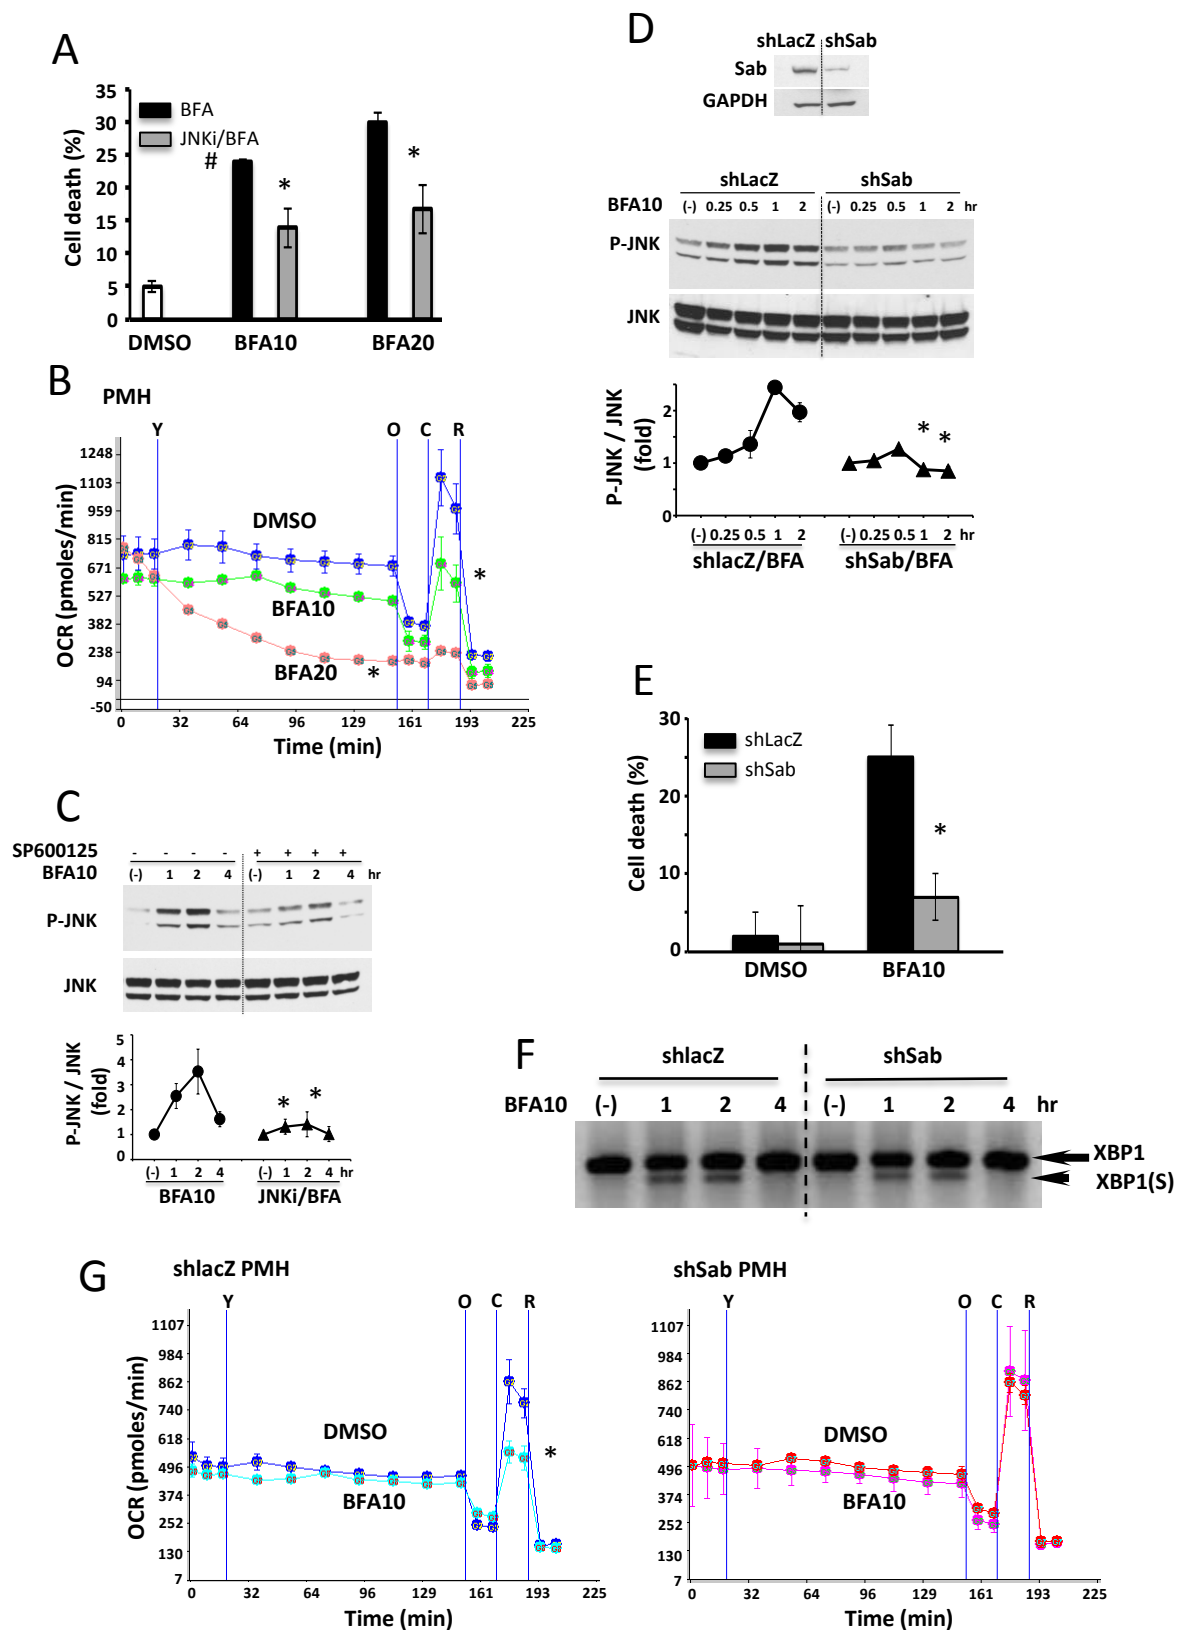

Fig.S2

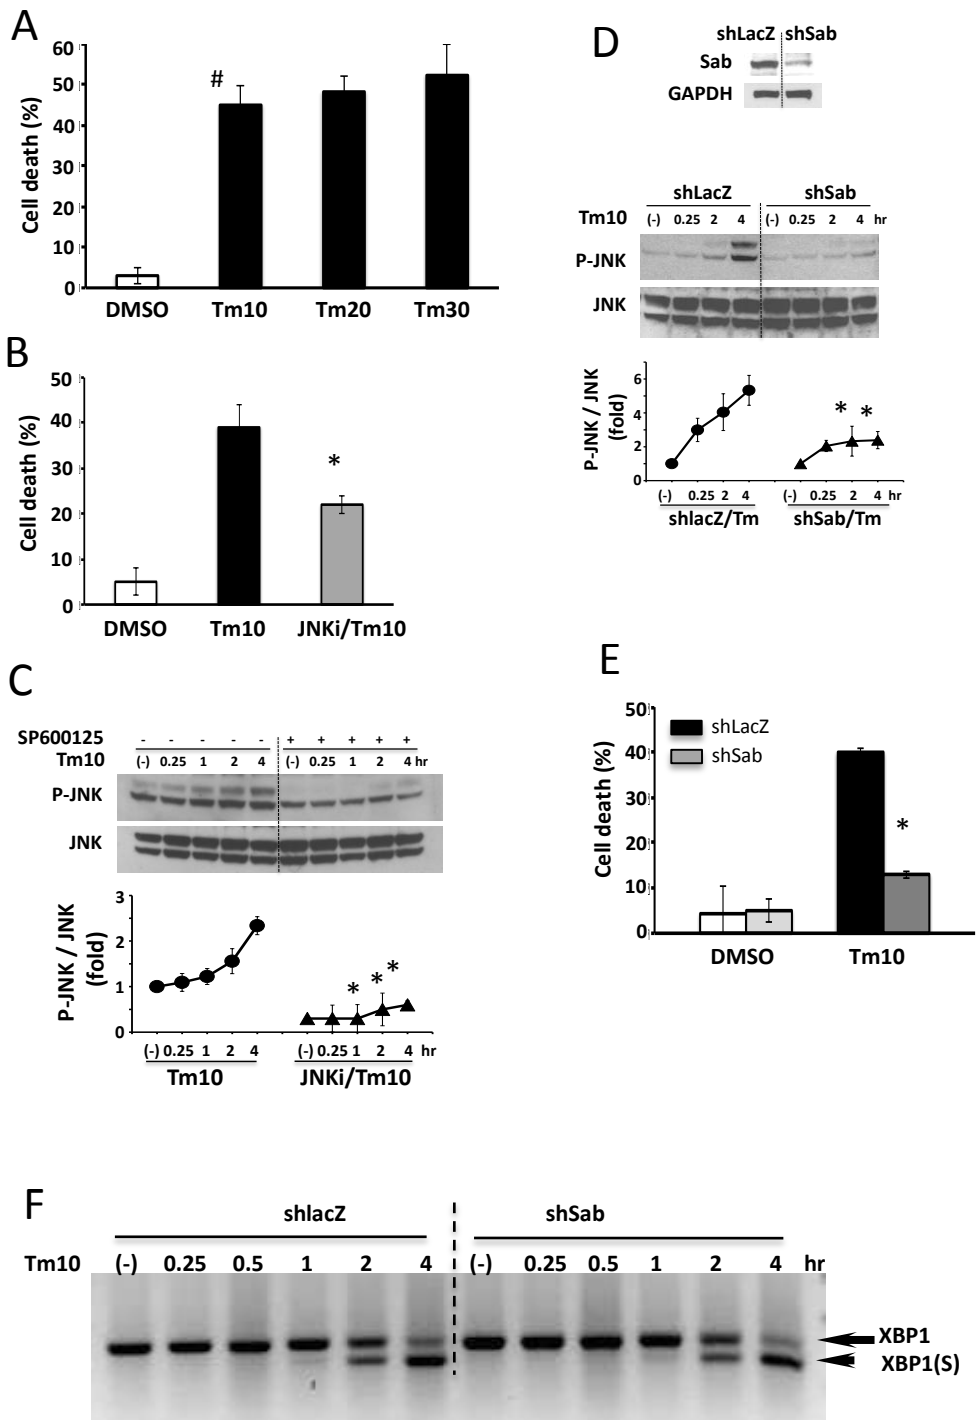

Fig.S3

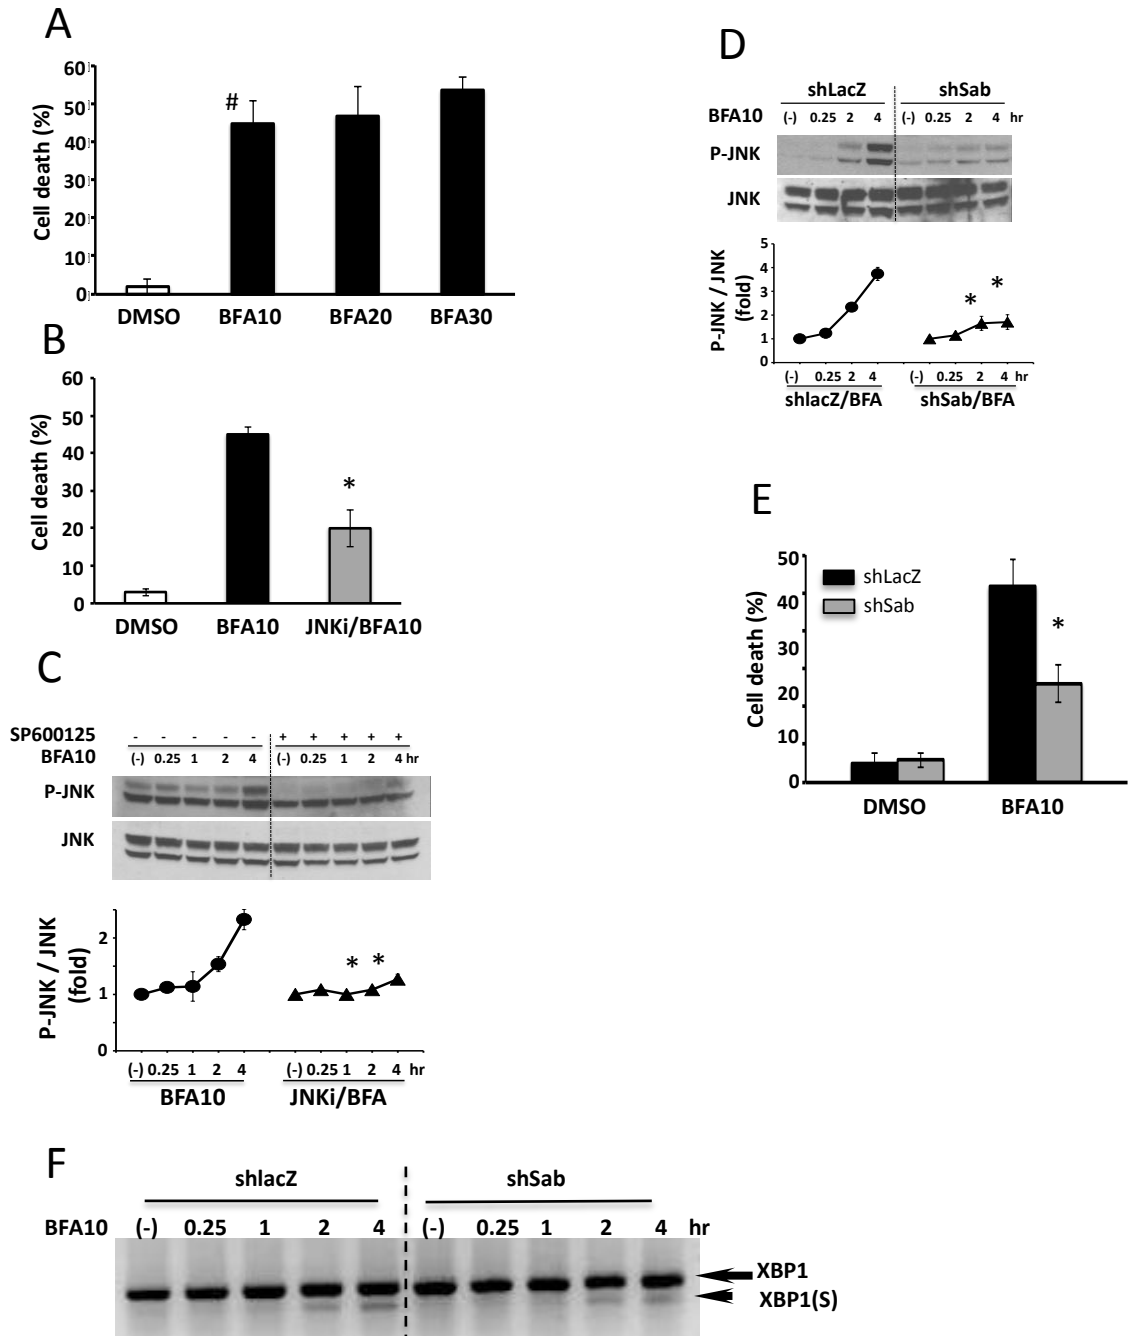

Fig.S4

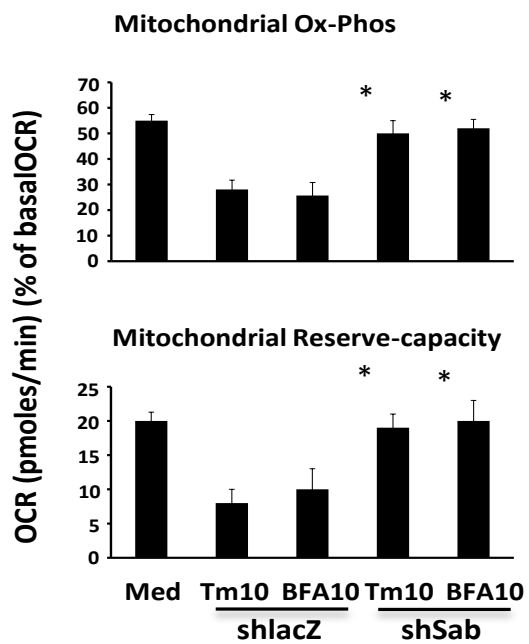

Fig.S5

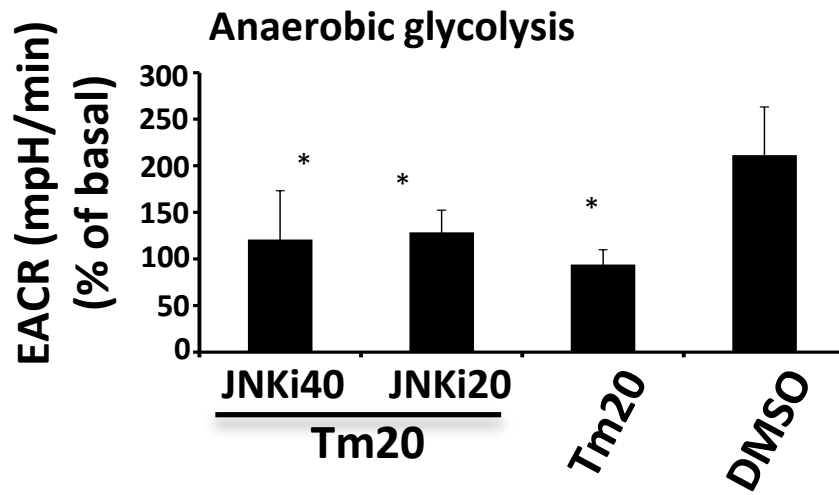

Fig.S6

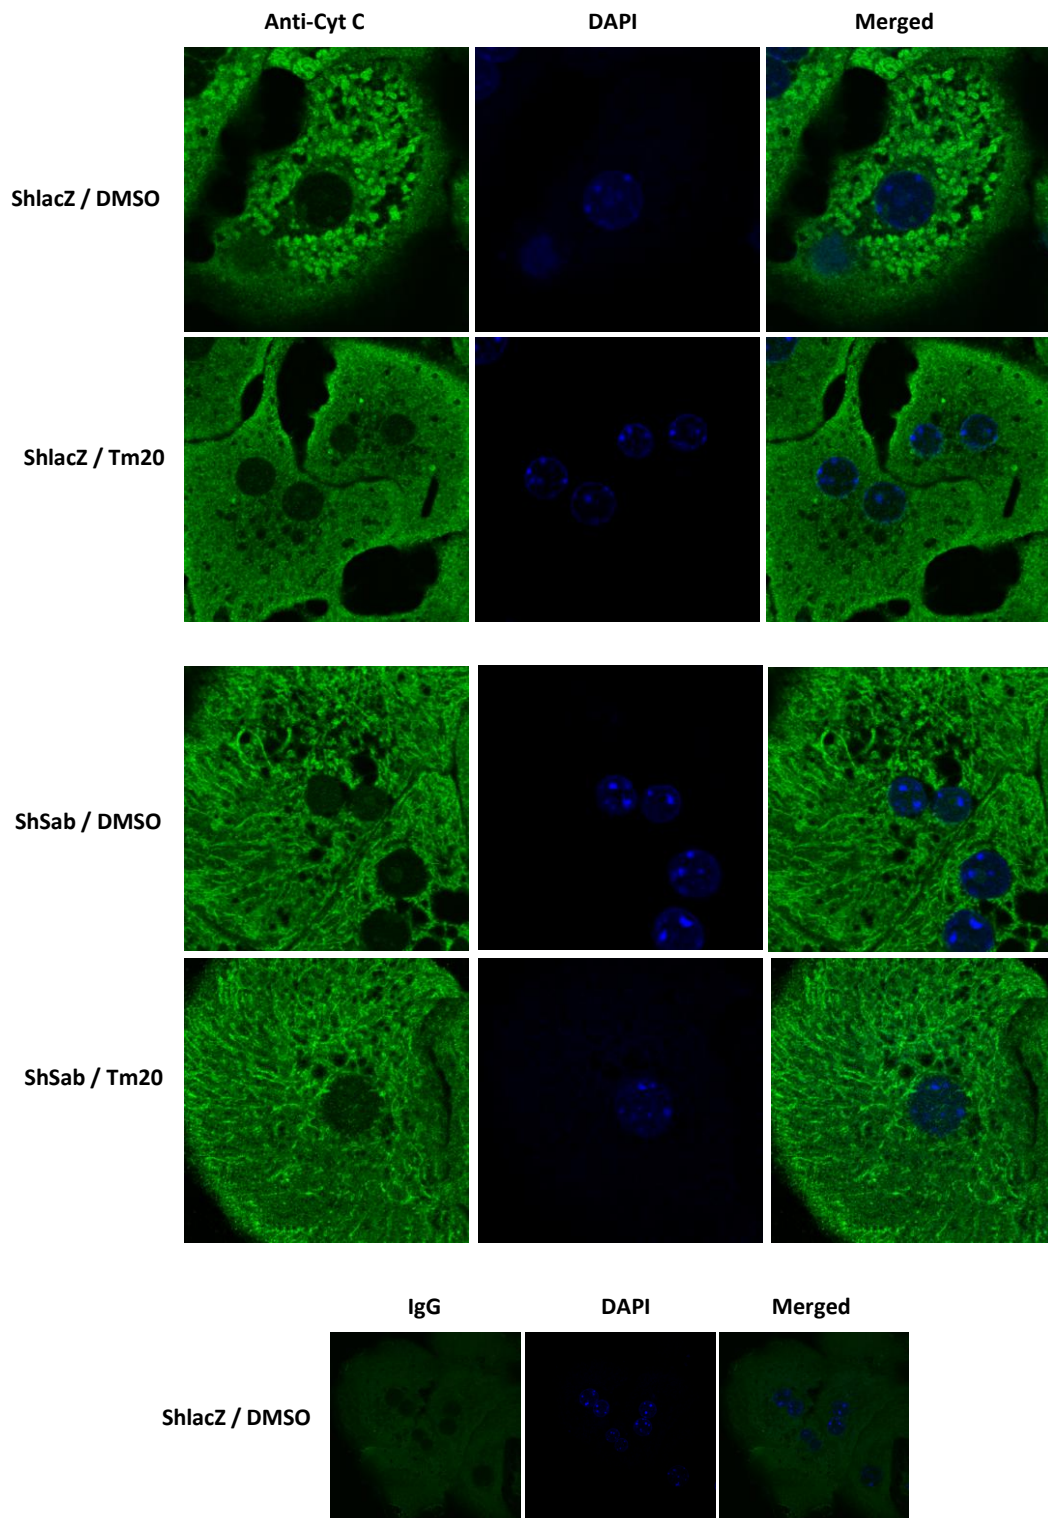

Fig.S7

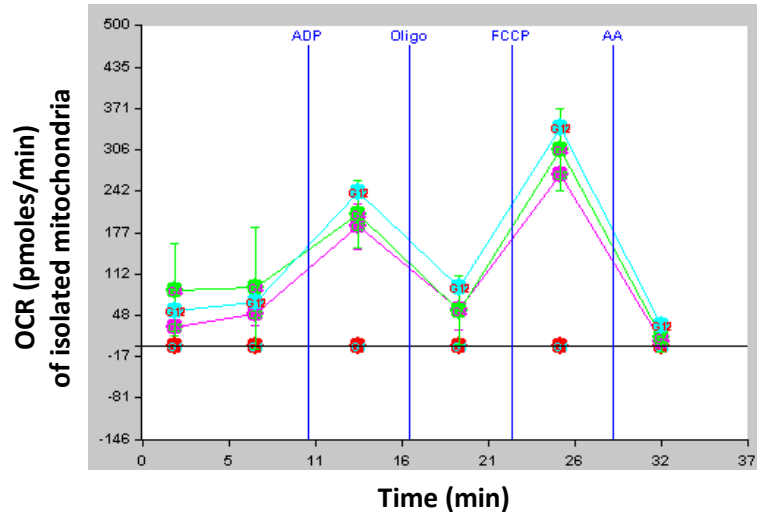

Fig.S8

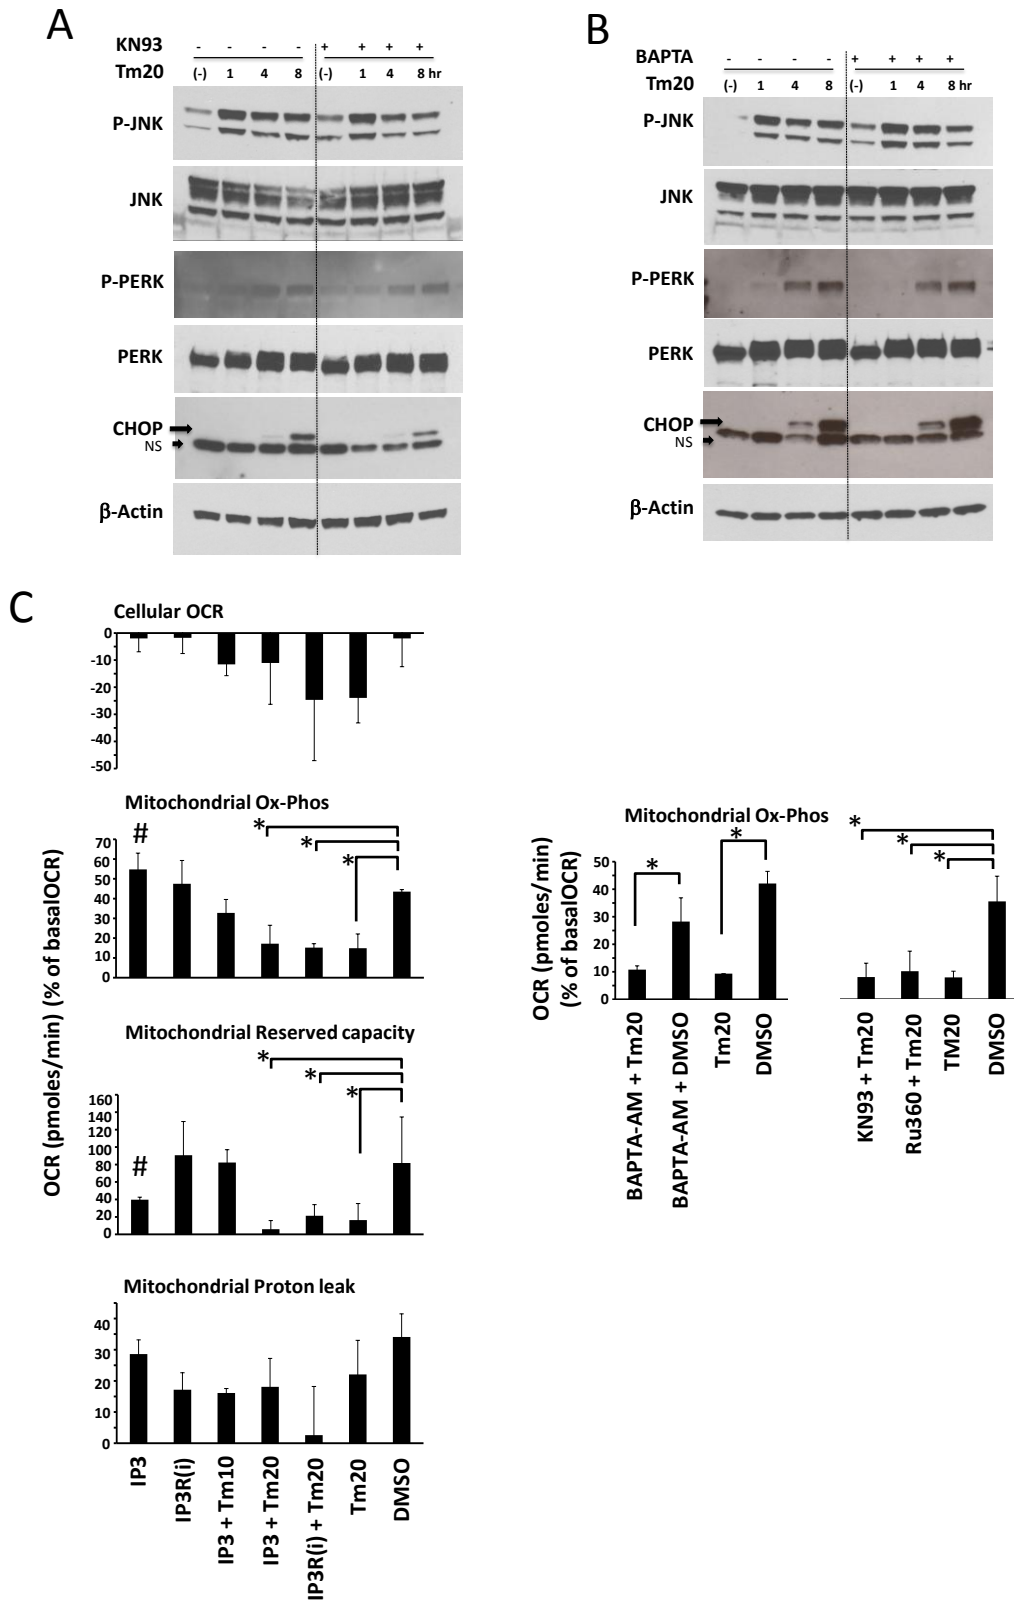

Supplement: cddis2013522x2.pdf [file cddis2013522x2.pdf]
